# Supplementary material
Source: PubMed Central journal article supplement (PMC218732)

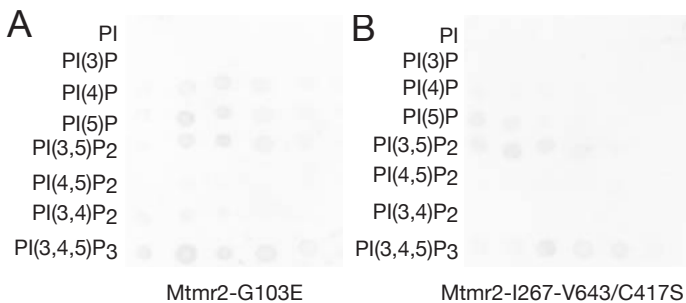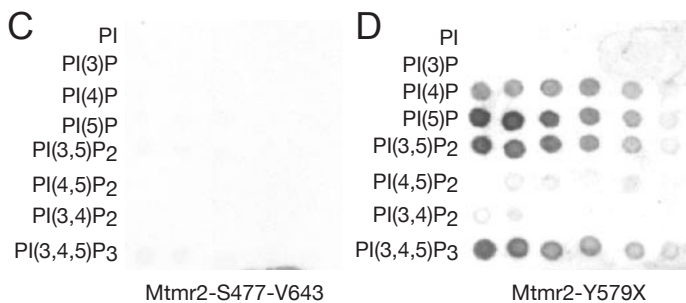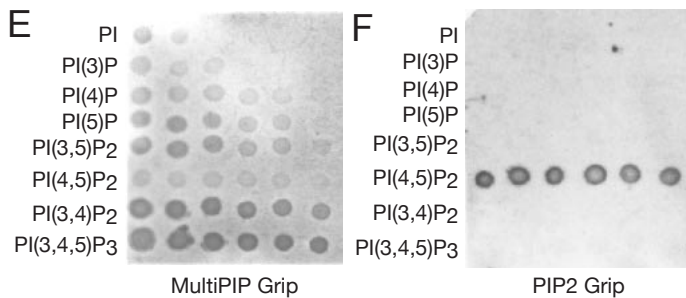

Supplement: pnas_2132732100_2.pdf [file pnas_2132732100_2.pdf]
